# Supplementary material
Source: PubMed Central journal article supplement (PMC3565453)
Supplement: mmi0083-1095-SD1.pdf [file mmi0083-1095-SD1.pdf]

## Supporting information

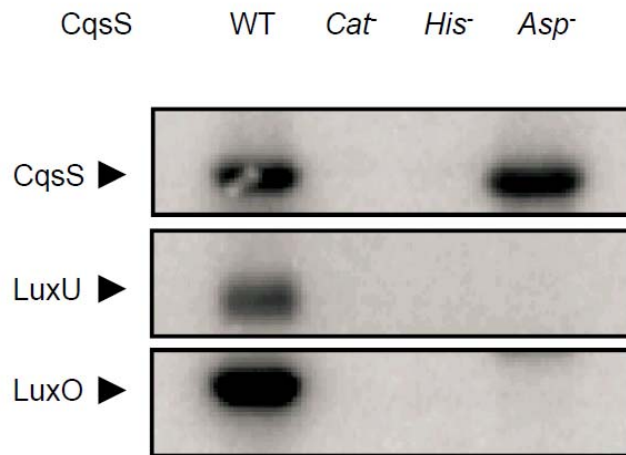

**Figure S1. Phosphorylation of LuxO requires wild type CqsS.** Phosphotransfer to LuxO was examined from wild type CqsS, CqsS *His*<sup>-</sup>, CqsS *Cat*<sup>-</sup>, and CqsS *Asp*<sup>-</sup> in the presence of LuxU.

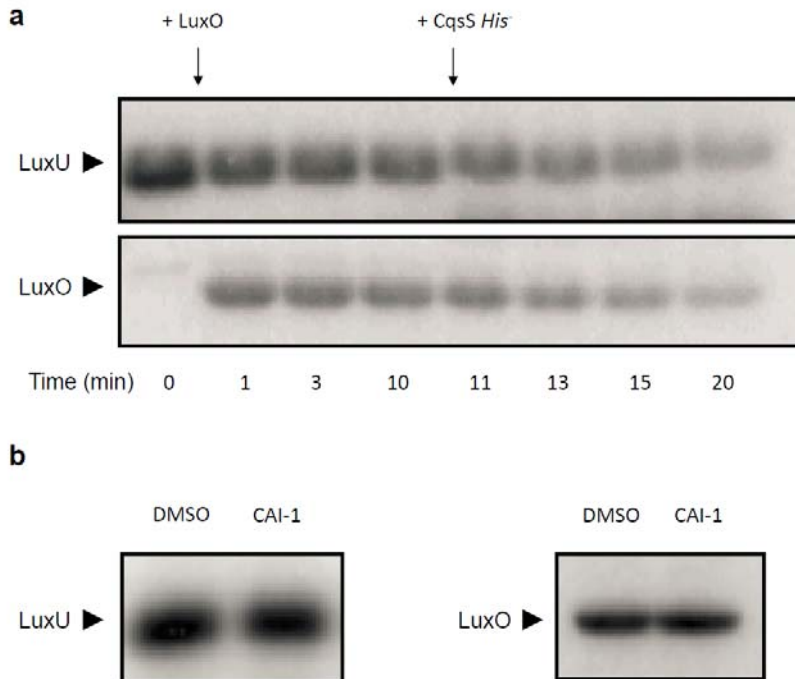

**Figure S2. LuxU~P and LuxO~P are stable.** (a) Phosphorylated LuxU was purified and is shown in the top left most lane. LuxO was added at T = 0. The bottom row shows phosphotransfer to LuxO. Both LuxU~P and LuxO~P are stable for at least 10 min. Addition of CqsS *His*<sup>-</sup> (which is a phosphatase) at T = 10 min shows that the phosphate group can indeed be removed from both LuxU~P and LuxO~P by an active phosphatase mechanism. (b) Left, phosphorylated LuxU was purified and divided in half. Either DMSO or 500  $\mu$ M CAI-1 was added to one of the aliquots and both samples were analyzed after 10 min. Right, LuxO was phosphorylated for 1 min using purified phosphorylated LuxU. The reaction was divided in half. Either DMSO or 500  $\mu$ M CAI-1 was added to one of the aliquots and both samples were analyzed after 10 min.

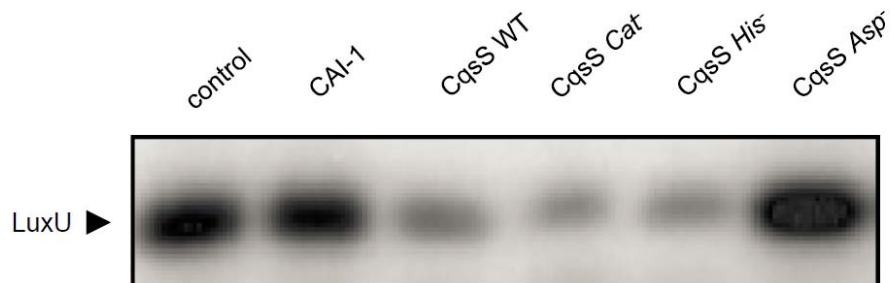

**Figure S3. CqsS phosphatase activity does not require His194 or the CA domain, whereas Asp619 is required.** Phosphorylated LuxU was purified and is shown in the control lane. Dephosphorylation of LuxU~P was examined following the addition of DMSO, CAI-1, CqsS WT, CqsS *Cat*<sup>-</sup>, CqsS *His*<sup>-</sup>, and CqsS *Asp*<sup>-</sup> for 10 min.
